# Supplementary material
Source: PubMed Central journal article supplement (PMC6748773)
Supplement: djy222_supplementary_data.pdf [file djy222_supplementary_data.pdf]

**Supplementary Table 1. Comparison of AUC between the average of radiologists and the AI system on each dataset and after pooling the data.\***

| <b>Dataset</b> | <b>Average AUC of radiologists (95% CI)</b> | <b>AUC AI system</b> | <b>AUC AI system – average AUC of radiologists (95%CI)</b> | <b>AUC best radiologist</b> |
|----------------|---------------------------------------------|----------------------|------------------------------------------------------------|-----------------------------|
| A              | 0.769 (0.698, 0.840)                        | 0.783                | +0.014 (-0.058, 0.086)                                     | 0.834                       |
| B              | 0.907 (0.854, 0.961)                        | 0.915                | +0.008 (-0.035,0.051)                                      | 0.943                       |
| C              | 0.858 (0.814, 0.901)                        | 0.879                | +0.021 (-0.0287, 0.0715)                                   | 0.909                       |
| D              | 0.815 (0.767, 0.864)                        | 0.850                | +0.036 (-0.015, 0.087)                                     | 0.856                       |
| E1             | 0.787 (0.732, 0.841)                        | 0.825                | +0.038 (-0.012,0.088)                                      | 0.861                       |
| E2             | 0.803 (0.763, 0.843)                        | 0.796                | -0.007 (-0.057, 0.043)                                     | 0.872                       |
| F              | 0.860 (0.831, 0.889)                        | 0.852                | -0.008 (-0.038, 0.022)                                     | 0.869                       |
| G              | 0.808 (0.752, 0.859)                        | 0.817                | +0.009 (-0.038, 0.054)                                     | 0.839                       |
| H              | 0.841 (0.785, 0.897)                        | 0.861                | +0.020 (-0.035, 0.075)                                     | 0.869                       |
| Overall        | 0.814                                       | 0.840                | +0.026 (-0.003,0.055)                                      | --                          |

\*AI = Artificial Intelligence, AUC = Area Under the Curve, CI = Confidence Interval.

**Supplementary Table 2. Average operating point of the radiologists using a case recall / no recall (BI-RADS >3) as threshold.\***

| <b>Dataset</b> | <b>Average specificity of radiologists (95% CI)</b> | <b>Average sensitivity of radiologists (95% CI)</b> | <b>Sensitivity AI at radiologists' specificity (95% CI)</b> | <b>Difference sensitivity AI - radiologists (95% CI)</b> | <b>AI system score threshold</b> |
|----------------|-----------------------------------------------------|-----------------------------------------------------|-------------------------------------------------------------|----------------------------------------------------------|----------------------------------|
| A              | 0.49 (0.40,0.61)                                    | 0.84 (0.76,0.92)                                    | 0.85 (0.73,0.97)                                            | +0.01 (-0.091,0.116)                                     | 7.32/10                          |
| B              | NA                                                  | NA                                                  | NA                                                          | NA                                                       | NA                               |
| C              | 0.79 (0.73,0.86)                                    | 0.77 (0.70,0.83)                                    | 0.80 (0.70,0.90)                                            | +0.03 (-0.062,0.126)                                     | 8.26/10                          |
| D              | 0.67 (0.62,0.73)                                    | 0.77 (0.67,0.87)                                    | 0.85 (0.77,0.93)                                            | +0.08 (-0.009,0.175)                                     | 7.52/10                          |
| E1             | 0.54 (0.47,0.60)                                    | 0.82 (0.75,0.89)                                    | 0.86 (0.76,0.96)                                            | +0.04 (-0.048,0.120)                                     | 7.12/10                          |
| E2             | 0.51 (0.46,0.57)                                    | 0.83 (0.78,0.88)                                    | 0.81 (0.73,0.89)                                            | -0.02 (-0.088,0.051)                                     | 7.52/10                          |
| F              | 0.68 (0.61,0.76)                                    | 0.84 (0.77,0.90)                                    | 0.86 (0.80,0.92)                                            | +0.02 (-0.088,0.051)                                     | 7.32/10                          |
| G              | 0.75 (0.67,0.82)                                    | 0.76 (0.67,0.85)                                    | 0.75 (0.65,0.85)                                            | -0.01 (-0.107,0.075)                                     | 8.01/10                          |
| H              | 0.73 (0.65,0.80)                                    | 0.83 (0.76,0.89)                                    | 0.81 (0.73,0.89)                                            | -0.02 (-0.112,0.070)                                     | 8.01/10                          |

\* For the AI system, the reported sensitivity is evaluated at the closest operating point to the average radiologist in terms of specificity (which corresponds to the specified threshold level). 95% CI are shown in parentheses, unless stated otherwise. AI = Artificial Intelligence, BI-RADS = Breast Imaging Reporting and Data System, CI = Confidence Interval, NA = Not Available.

Dataset A

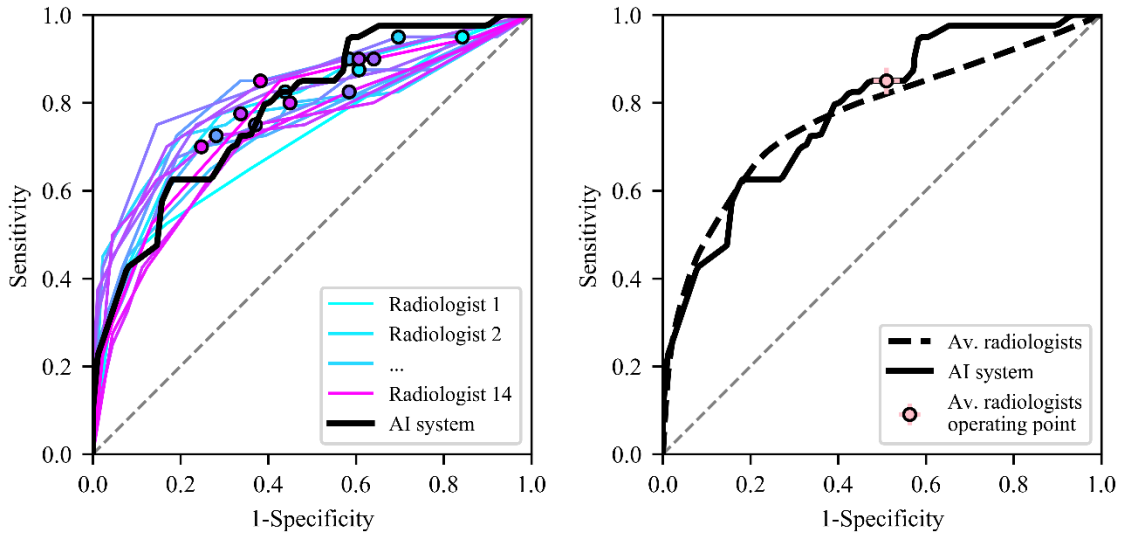

Dataset B

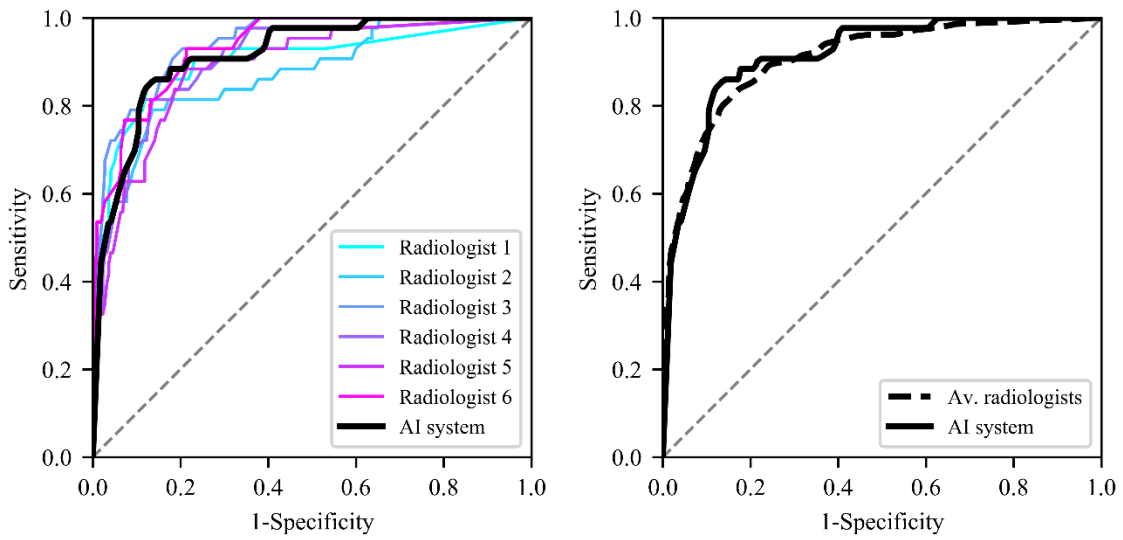

Dataset C

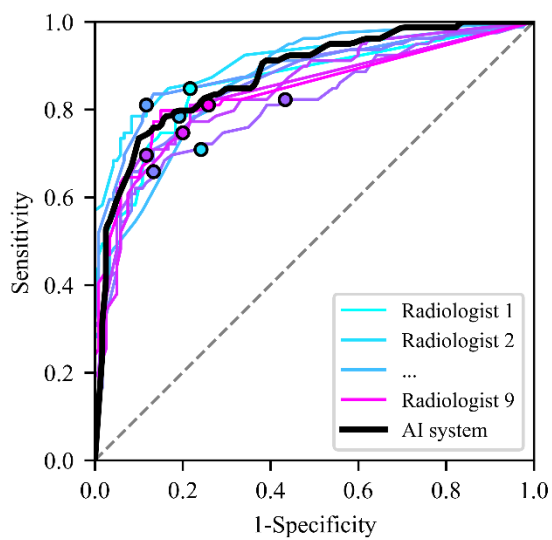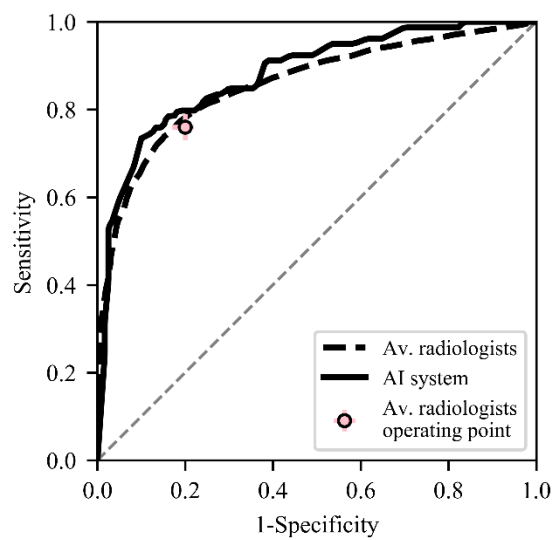

Dataset D

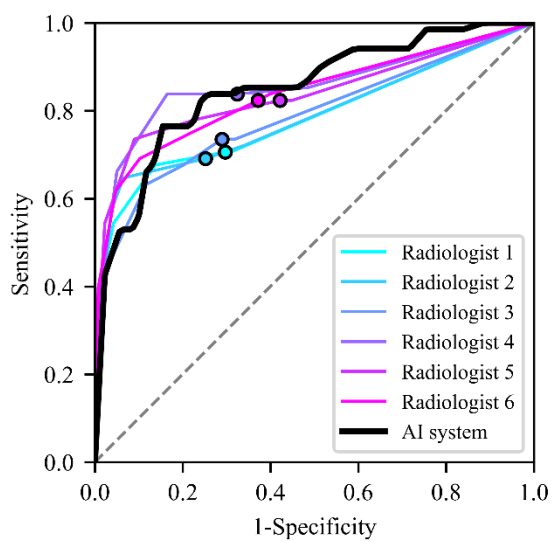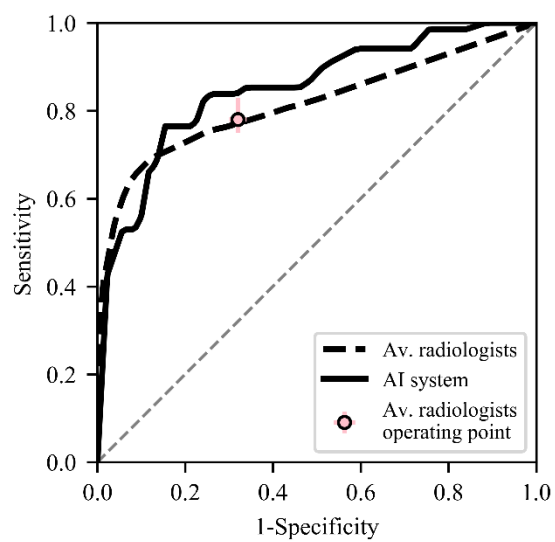

Dataset E1

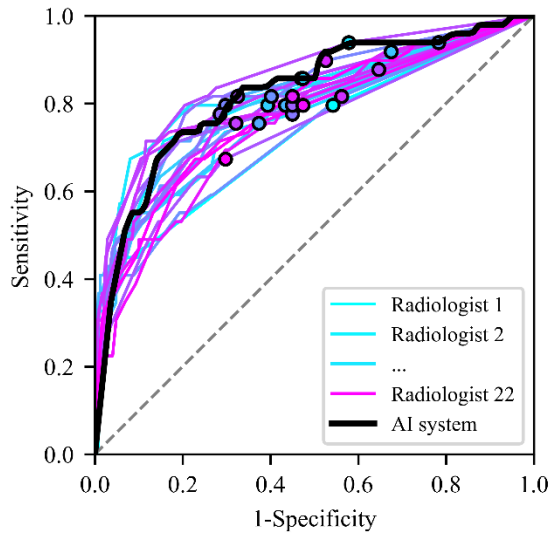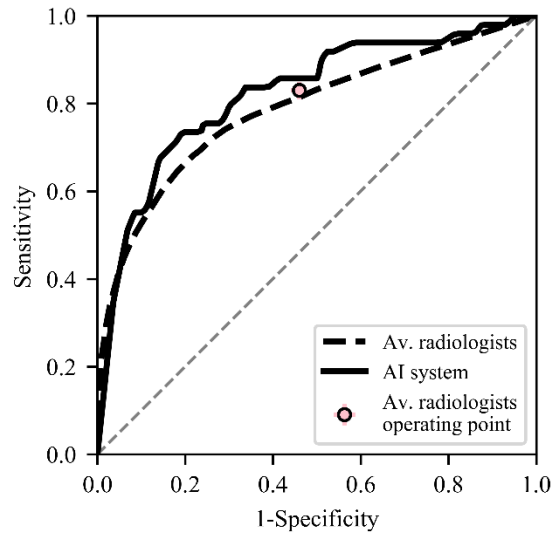

Dataset E2

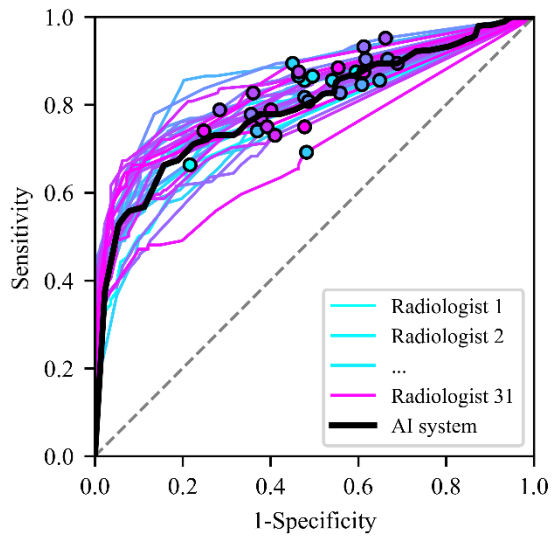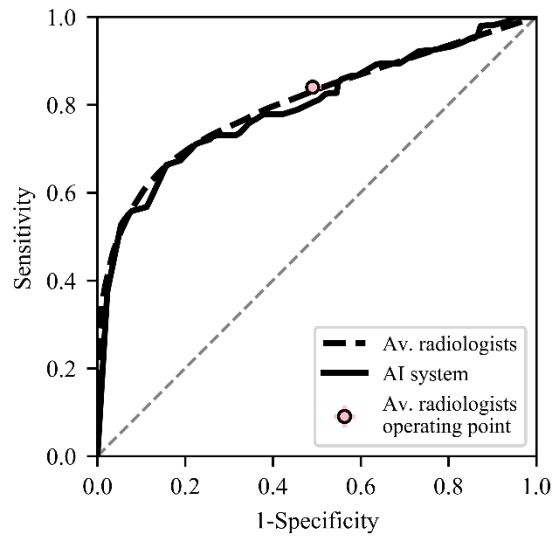

Dataset F

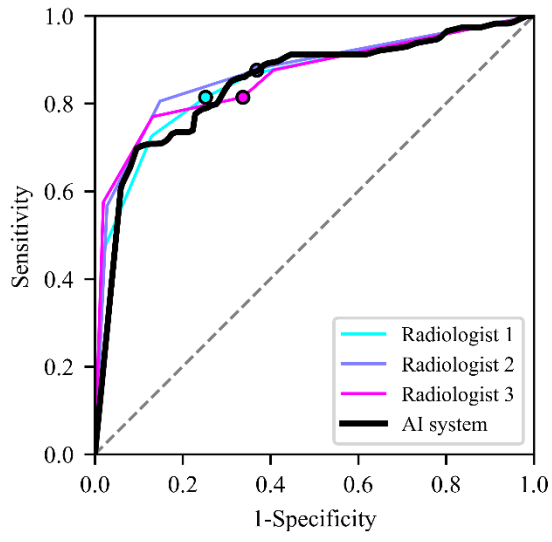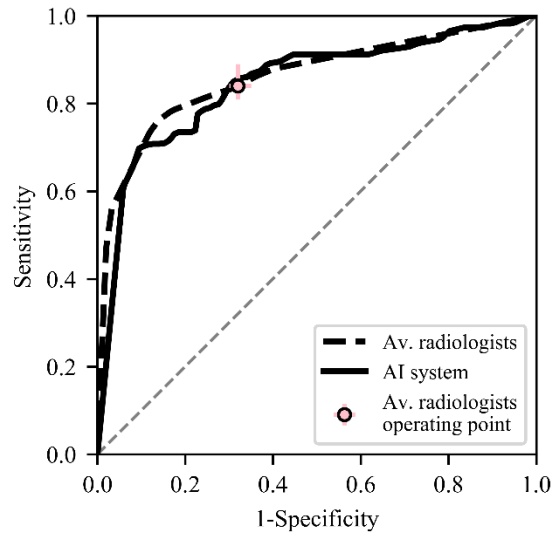

Dataset G

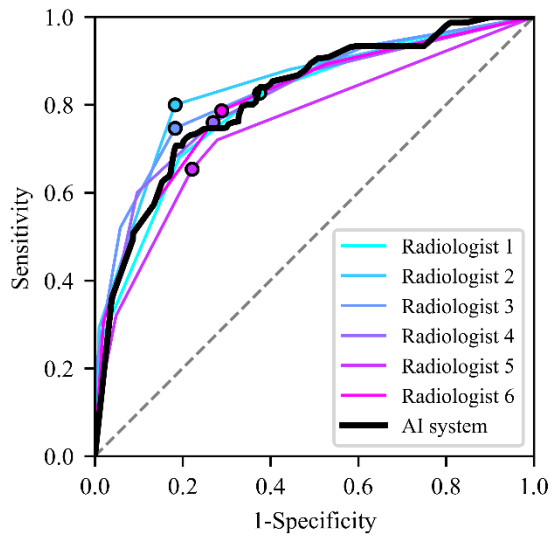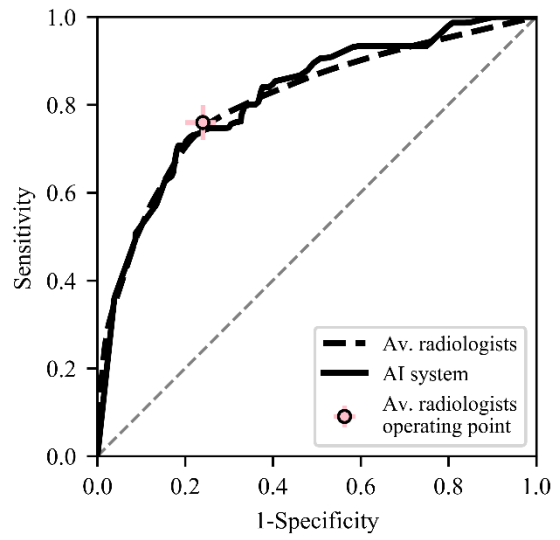

Dataset H

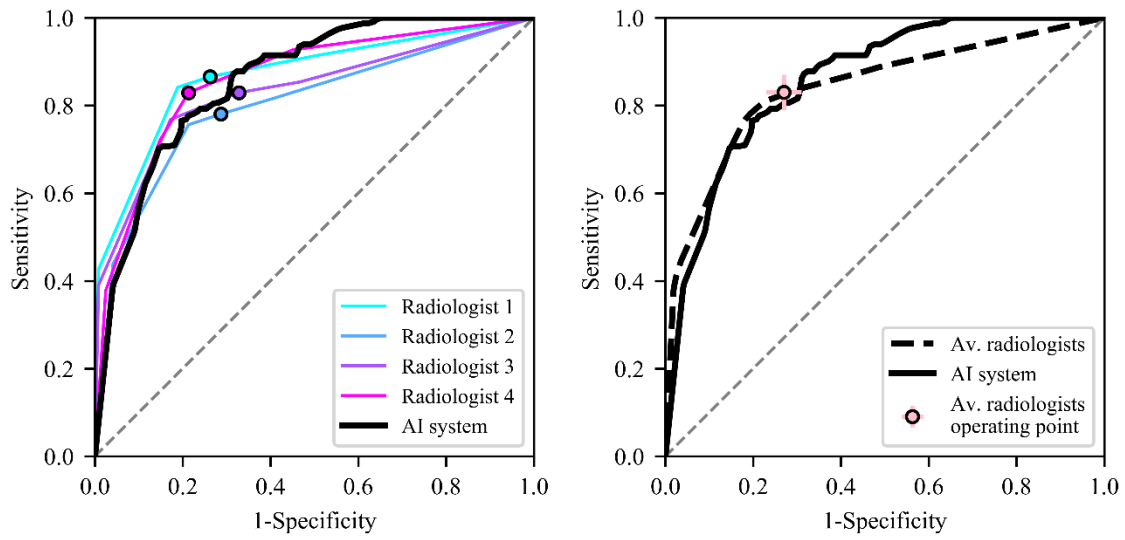

Supplementary Figure 1. For each dataset (A-H, see Table 1 for details), the receiver operating characteristic (ROC) curve of the artificial intelligence (AI) system is plotted against: (left) the ROC curves and operating points of each reader, and (right) the ROC curve and operating point of the average (Av.) of radiologists.
